# Supplementary material for: Establishment and Characterization of 5-Fluorouracil-Resistant Human Colorectal Cancer Stem-Like Cells: Tumor Dynamics under Selection Pressure
Source: MDPI journal article supplement (doi:10.3390/ijms20081817), 2019-04-12
Supplement: s1 [file s1]

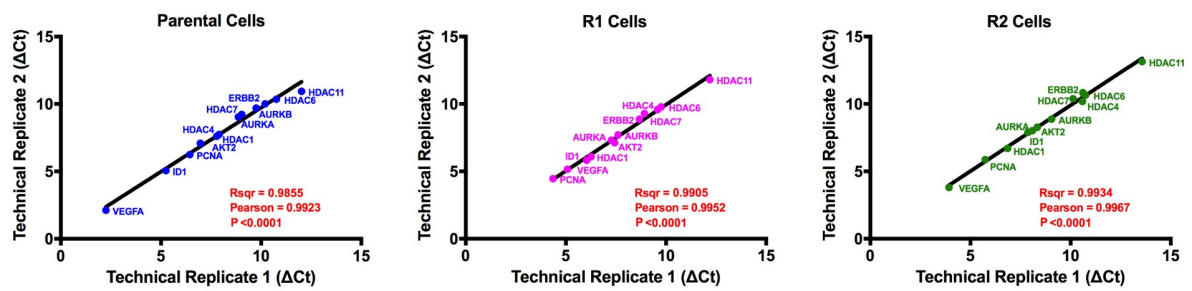

**Supplementary Figure S1.** Graphs of linear regression and Pearson correlation obtained from the  $\Delta C_t$  values of a dozen of randomly selected genes in two technical replicates of parental, R1 or R2 cells.

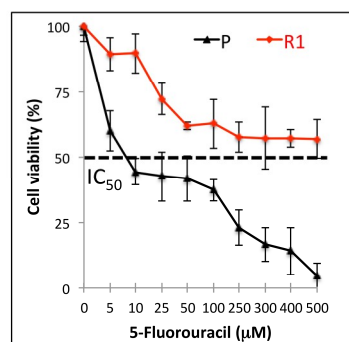

**Supplementary Figure 2.** Line graph shows cell viability (%) of parental (black line) or R1 (red line) cells (two months after their establishment) following treatment with vehicle or serial dilutions (10-500  $\mu M$ ) of 5-FU. Data are expressed as mean percentage ( $\pm$  SD) of cell numbers relative to control culture.
